# Supplementary material for: Machine Learning Models to Predict 30-Day Mortality in Mechanically Ventilated Patients
Source: MDPI journal article supplement (doi:10.3390/jcm10102172), 2021-05-18
Supplement: s1 [file s1]

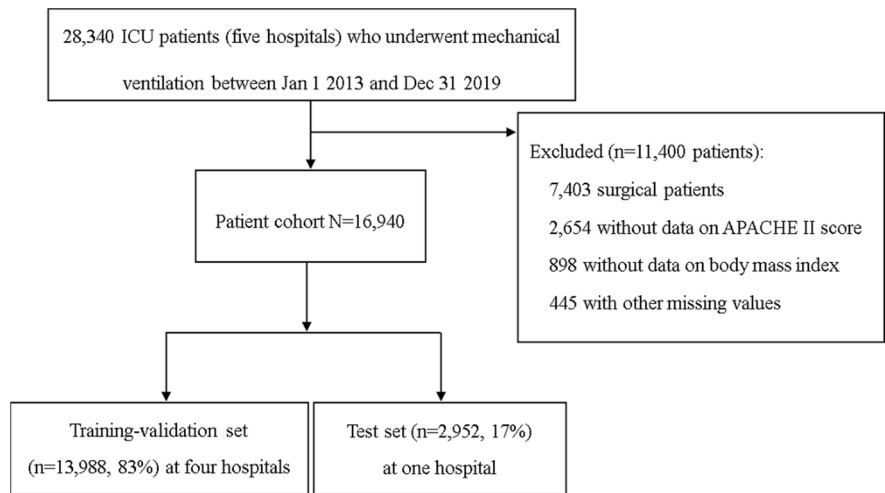

**Figure S1.** Flow chart of the patients.

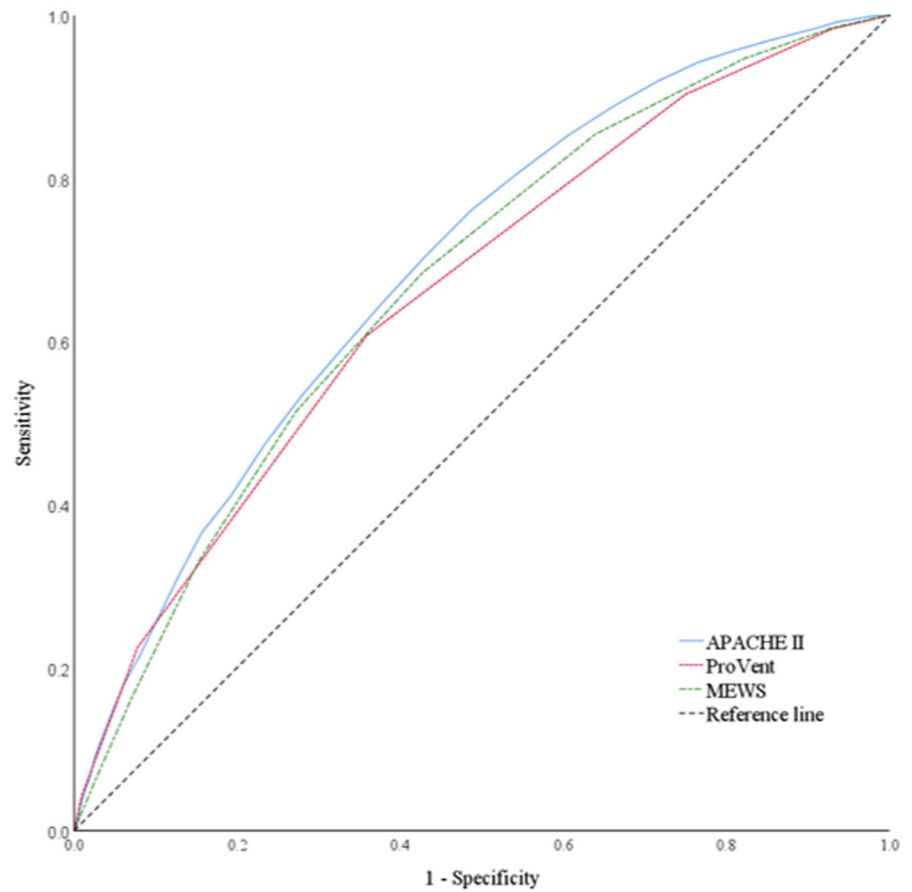

**Figure S2.** Receiver operating characteristics (ROC) curves of conventional scoring systems for predicting 30-day mortality in mechanically ventilated patients in total patients.

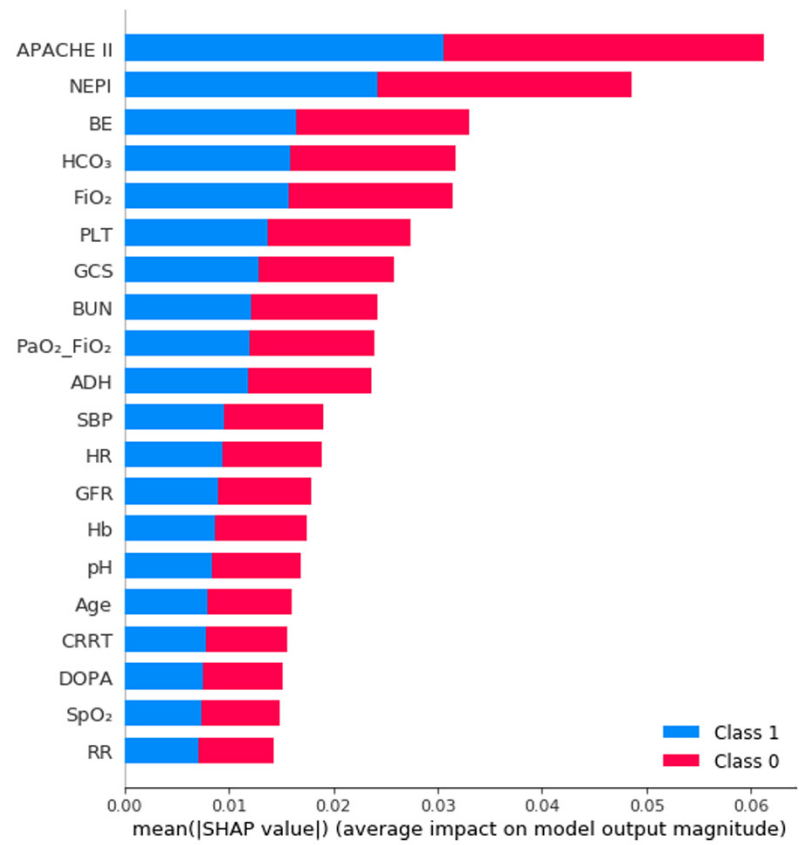

**Figure S3.** SHAP features importance for the determinants of 30-day mortality in BRF.

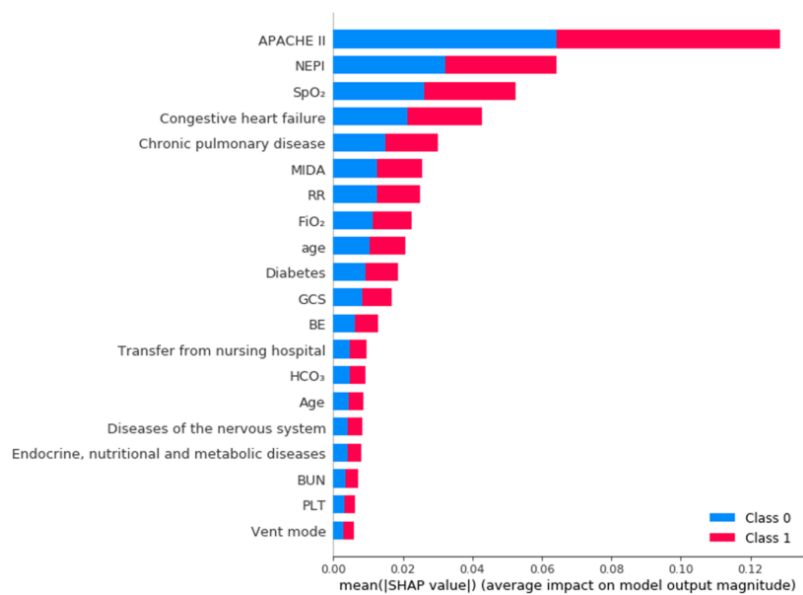

**Figure S4.** SHAP features importance for the determinants of 30-day mortality in LGBM.

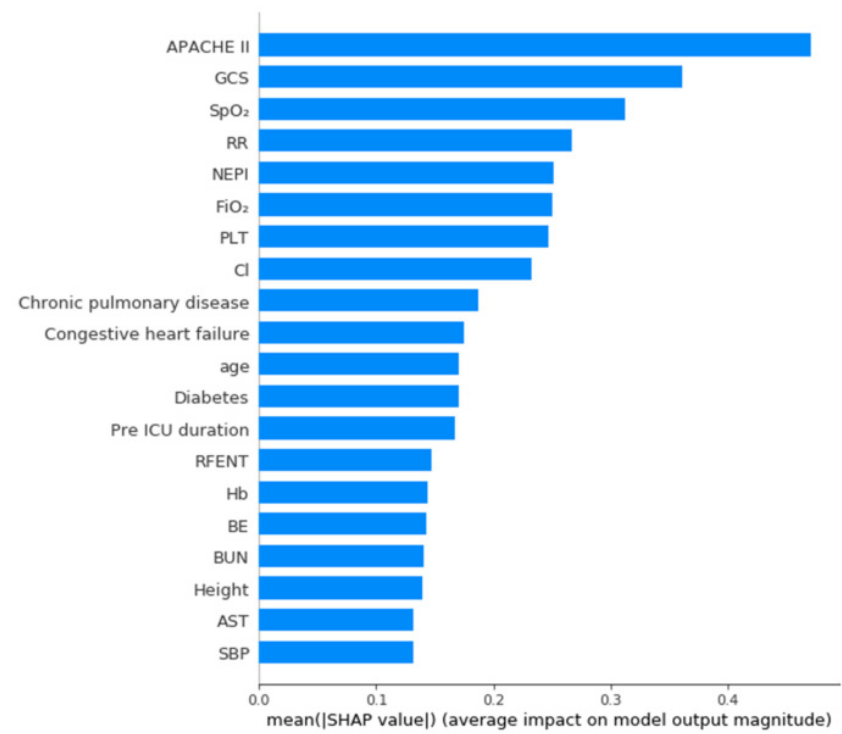

**Figure S5.** SHAP features importance for the determinants of 30-day mortality in XGB.

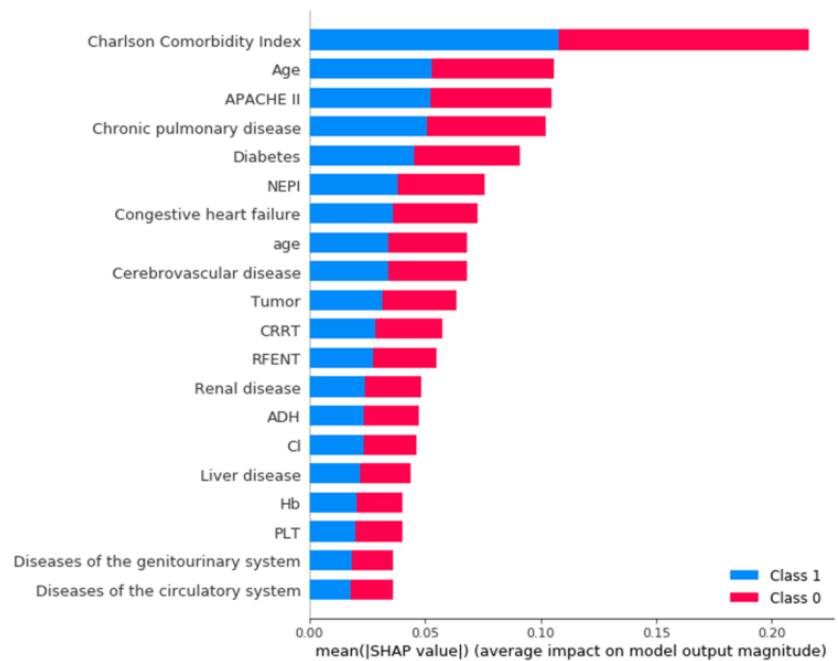

**Figure S6.** SHAP features importance for the determinants of 30-day mortality in MLP.

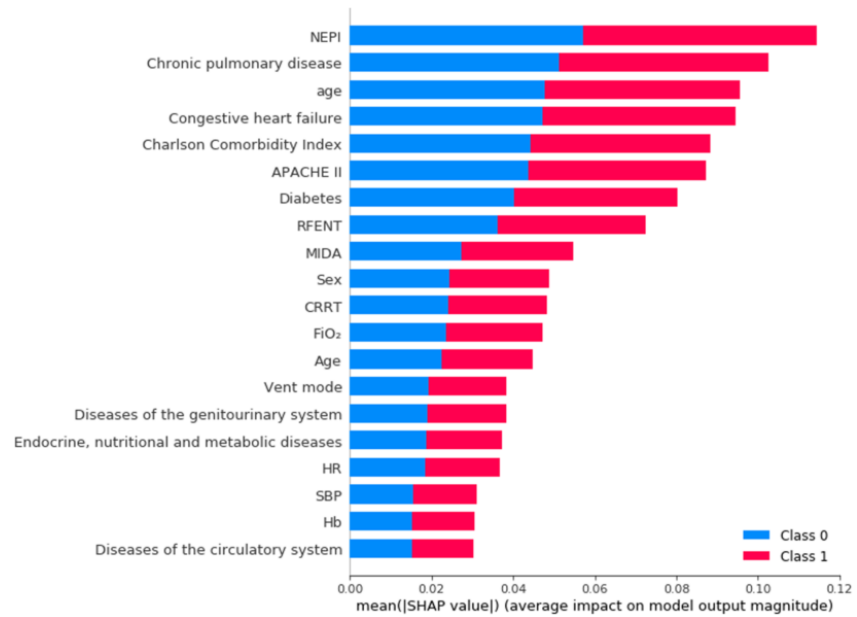

**Figure S7.** SHAP features importance for the determinants of 30-day mortality in LR.

**Table S1.** Baseline characteristics and laboratory findings of the patients according to mortality.

| Variables                                                            | Total<br>(n=16,940) | Survivors<br>(n=11,879) | Non-survivors<br>(n=5,061) | <i>p</i><br>Value |
|----------------------------------------------------------------------|---------------------|-------------------------|----------------------------|-------------------|
| Age (years)                                                          | 67±15               | 66±15                   | 69±14                      | <0.001            |
| Male sex (%)                                                         | 61.5                | 61.3                    | 61.8                       | 0.567             |
| Body mass index (kg/m <sup>2</sup> )                                 | 22.6±4.2            | 22.8±4.2                | 22.0±4.2                   | <0.001            |
| Status post tracheostomy (%)                                         | 3.6                 | 4.3                     | 2.1                        | <0.001            |
| Diagnostic category <sup>a</sup> (%)                                 |                     |                         |                            |                   |
| Diseases of the respiratory system                                   | 49.0                | 48.9                    | 49.4                       | 0.552             |
| Diseases of the circulatory system                                   | 44.3                | 44.6                    | 43.4                       | 0.151             |
| Diseases of the digestive system                                     | 15.2                | 14.2                    | 17.4                       | <0.001            |
| Diseases of the genitourinary system                                 | 20.3                | 19.8                    | 21.6                       | 0.005             |
| Certain infectious and parasitic diseases                            | 17.0                | 15.9                    | 19.5                       | <0.001            |
| Endocrine, nutritional, and metabolic diseases                       | 14.                 | 15.0                    | 13.3                       | 0.004             |
| Neoplasms                                                            | 16.9                | 16.2                    | 18.6                       | <0.001            |
| Diseases of the nervous system                                       | 9.3                 | 10.3                    | 7.0                        | <0.001            |
| Injury, poisoning, and certain other consequences of external causes | 8.0                 | 8.3                     | 7.5                        | 0.097             |
| Diseases of the musculoskeletal system and connective tissue         | 4.4                 | 4.8                     | 3.5                        | <0.001            |
| Vital signs                                                          |                     |                         |                            |                   |
| Systolic blood pressure (mmHg)                                       | 121±33              | 124±32                  | 112±33                     | <0.001            |
| Diastolic blood pressure (mmHg)                                      | 71±22               | 73±21                   | 67±23                      | <0.001            |
| Mean blood pressure                                                  | 88±24               | 90±23                   | 82±24                      | <0.001            |
| Heart rate (/min)                                                    | 104±26              | 102±25                  | 110±28                     | <0.001            |
| Respiratory rate (/min)                                              | 17±4                | 16±4                    | 18±4                       | <0.001            |
| Body temperature (°C)                                                | 36.4±1.0            | 36.4±0.9                | 36.4±1.0                   | 0.023             |
| SpO <sub>2</sub> (%)                                                 | 96±8                | 97±7                    | 94±10                      | <0.001            |

|                                         |           |           |           |        |
|-----------------------------------------|-----------|-----------|-----------|--------|
| Glasgow coma scale                      | 7±3       | 7±3       | 6±3       | <0.001 |
| Ventilator mode (%)                     |           |           |           | <0.001 |
| Pressure control mode                   | 42.9      | 40.4      | 48.8      |        |
| Volume control mode                     | 38.3      | 39.1      | 36.4      |        |
| Pressure support                        | 6.7       | 7.4       | 5.2       |        |
| SIMV                                    | 10.4      | 11.3      | 8.5       |        |
| CPAP                                    | 1.6       | 1.8       | 1.1       |        |
| FiO <sub>2</sub>                        | 65±23     | 62±22     | 73±24     | <0.001 |
| Arterial blood gases                    |           |           |           |        |
| pH                                      | 7.31±0.15 | 7.33±0.13 | 7.27±0.17 | <0.001 |
| PaCO <sub>2</sub> (mmHg)                | 41±17     | 40±16     | 41±19     | <0.001 |
| PaO <sub>2</sub> (mmHg)                 | 140±93    | 143±90    | 131±99    | <0.001 |
| HCO <sub>3</sub> <sup>-</sup> (mmol/L)  | 20±6      | 21±6      | 19±7      | <0.001 |
| BE                                      | -5.6±7.2  | -4.6±6.7  | -8.0±7.7  | <0.001 |
| SaO <sub>2</sub> (%)                    | 94±12     | 95±10     | 91±14     | <0.001 |
| Laboratory results                      |           |           |           |        |
| White blood cells (×10 <sup>9</sup> /L) | 13.1±8.0  | 12.8±6.8  | 13.8±10.2 | <0.001 |
| Hematocrit                              | 34.6±7.6  | 35.3±7.3  | 32.9±8.1  | <0.001 |
| Hemoglobin (g/dL)                       | 11.4±2.6  | 11.7±2.5  | 10.8±2.7  | <0.001 |
| Platelets (×10 <sup>9</sup> /L)         | 202±115   | 212±112   | 178±119   | <0.001 |
| Aspartate aminotransferase (IU/L)       | 191±864   | 139±724   | 314±1116  | <0.001 |
| Alanine aminotransferase (IU/L)         | 94±361    | 73±282    | 141±496   | <0.001 |
| Blood urea nitrogen (mg/dL)             | 27.4±22.0 | 24.9±20.2 | 33.4±24.7 | <0.001 |
| Serum creatinine (mg/dL)                | 1.6±1.7   | 1.5±1.8   | 1.9±1.7   | <0.001 |
| eGFR (mL/min/1.73m <sup>2</sup> )       | 74±58     | 80±60     | 61±52     | <0.001 |
| Serum sodium (mmol/L)                   | 139±7     | 139±6     | 138±7     | <0.001 |
| Serum potassium (mmol/L)                | 4.2±0.9   | 4.1±0.9   | 4.3±1.0   | <0.001 |
| Serum chloride (mmol/L)                 | 104±7     | 104±7     | 103±8     | <0.001 |

Values are presented as the mean±SD or as %. <sup>a</sup> Diagnostic categories are defined using the Korean Standard Classification of Diseases-7 (KCD-7) codes, which is a Korean version of the International Classification of Diseases-10 (ICD-10). SpO<sub>2</sub>, pulse oximeter saturation; SIMV, synchronized intermittent mandatory ventilation; CPAP, continuous positive airway pressure; FiO<sub>2</sub>, fraction of inspired oxygen; PaCO<sub>2</sub>, partial pressure of carbon dioxide; PaO<sub>2</sub>, partial pressure of oxygen; HCO<sub>3</sub><sup>-</sup>, bicarbonate; BE, base excess; SaO<sub>2</sub>, arterial oxygen saturation; eGFR, estimated glomerular filtration rate.

**Table S2.** Baseline patient characteristics according to validation dataset.

| Variables                                                 | Total (n=16,940) | Training-validation set (n=13,988) | Test set (n=2,952) | <i>p</i> Value |
|-----------------------------------------------------------|------------------|------------------------------------|--------------------|----------------|
| Age (years)                                               | 67±15            | 67±15                              | 68±15              | <0.001         |
| Male sex (%)                                              | 61.5             | 61.4                               | 61.5               | 0.992          |
| Body mass index (kg/m <sup>2</sup> )                      | 22.6±4.2         | 22.6±4.2                           | 22.7±4.2           | 0.186          |
| Interval between hospitalization and ICU admission (days) | 2±7              | 2±7                                | 3±7                | 0.329          |
| Interval between hospitalization and MV initiation (days) | 1±6              | 1±6                                | 2±7                | <0.001         |
| APACHE II                                                 | 23±4             | 23±7                               | 24±7               | <0.001         |
| ProVent score                                             | 3±1              | 3±1                                | 3±1                | <0.001         |
| Modified Early Warning Score                              | 5±2              | 5±2                                | 5±2                | <0.001         |
| Status post tracheostomy (%)                              | 3.6              | 3.6                                | 3.6                | 0.843          |

|                                                                      |       |       |       |        |
|----------------------------------------------------------------------|-------|-------|-------|--------|
| Transferred from skilled nursing facility (%)                        | 9.2   | 9.5   | 8.0   | 0.011  |
| Charlson Comorbidity Index                                           | 4±3   | 4±2   | 5±3   | <0.001 |
| Comorbidities <sup>a</sup> (%)                                       |       |       |       |        |
| Diabetes                                                             | 20.5  | 18.6  | 29.2  | <0.001 |
| Congestive heart failure                                             | 18.1  | 17.2  | 22.3  | <0.001 |
| Myocardial infarction                                                | 8.5   | 8.2   | 9.9   | 0.003  |
| Chronic pulmonary disease                                            | 16.5  | 14.9  | 24.3  | <0.001 |
| Liver disease                                                        | 9.3   | 8.0   | 15.6  | <0.001 |
| Moderate to severe CKD                                               | 12.6  | 11.9  | 16.2  | <0.001 |
| Any malignancy                                                       | 20.1  | 19.6  | 22.1  | 0.002  |
| Rheumatic disease                                                    | 1.6   | 1.7   | 1.4   | 0.329  |
| Dementia                                                             | 7.0   | 5.8   | 12.5  | <0.001 |
| Cerebrovascular disease                                              | 26.6  | 25.4  | 32.4  | <0.001 |
| Diagnostic category <sup>b</sup> (%)                                 |       |       |       |        |
| Diseases of the respiratory system                                   | 49.0  | 49.0  | 49.2  | 0.799  |
| Diseases of the circulatory system                                   | 44.3  | 42.9  | 50.5  | <0.001 |
| Diseases of the digestive system                                     | 15.2  | 14.3  | 19.2  | <0.001 |
| Diseases of the genitourinary system                                 | 20.3  | 19.8  | 22.9  | <0.001 |
| Certain infectious and parasitic diseases                            | 17.0  | 17.4  | 15.0  | 0.002  |
| Endocrine, nutritional, and metabolic diseases                       | 14.4  | 13.0  | 21.1  | <0.001 |
| Neoplasms                                                            | 16.9  | 16.8  | 17.4  | 0.431  |
| Diseases of the nervous system                                       | 9.3   | 9.1   | 10.2  | 0.066  |
| Injury, poisoning, and certain other consequences of external causes | 8.0   | 7.4   | 10.9  | <0.001 |
| Diseases of the musculoskeletal system and connective tissue         | 4.4   | 4.1   | 5.7   | <0.001 |
| Continuous renal replacement therapy (%)                             | 14.6  | 14.3  | 16.0  | 0.015  |
| Transfusion (%)                                                      | 27.3  | 27.2  | 27.8  | 0.447  |
| Medications (%)                                                      |       |       |       |        |
| Vasopressors and inotropes                                           | 50.9  | 49.5  | 57.2  | <0.001 |
| Corticosteroids                                                      | 16.4  | 14.6  | 24.7  | <0.001 |
| Opioids                                                              | 33.7  | 31.1  | 45.6  | <0.001 |
| Sedatives                                                            | 20.8  | 16.3  | 42.5  | <0.001 |
| Neuromuscular blockades                                              | 12.4  | 12.1  | 14.0  | 0.004  |
| Length of stay (day)                                                 | 29±36 | 28±34 | 31±45 | 0.007  |
| ICU stay (day)                                                       | 16±27 | 16±25 | 18±36 | 0.030  |
| Duration of MV (day)                                                 | 11±23 | 10±20 | 12±31 | 0.032  |
| 30-d mortality (%)                                                   | 29.9  | 31.5  | 22.0  | <0.001 |

Values are presented as the mean±SD or as %. <sup>a</sup> Comorbidities are categorized using the Charlson Comorbidity Index. <sup>b</sup> Diagnostic categories are defined using the Korean Standard Classification of Diseases-7 (KCD-7) codes, which is a Korean version of the International Classification of Diseases-10 (ICD-10) codes. ICU, intensive care unit; MV, mechanical ventilation; APACHE, Acute Physiology and Chronic Health Evaluation; CKD, chronic kidney disease.

**Table S3.** Clinical and laboratory findings according to validation dataset.

| Variables                                | Total<br>(n=16,940) | Training-validation set<br>(n=13,988) | Test set<br>(n=2,952) | p<br>Value |
|------------------------------------------|---------------------|---------------------------------------|-----------------------|------------|
| Vital signs                              |                     |                                       |                       |            |
| Systolic blood pressure (mmHg)           | 121±33              | 121±33                                | 121±33                | 0.763      |
| Diastolic blood pressure (mmHg)          | 71±22               | 72±22                                 | 71±22                 | 0.070      |
| Mean blood pressure                      | 88±24               | 88±24                                 | 87±24                 | 0.207      |
| Heart rate (/min)                        | 104±26              | 104±26                                | 104±26                | 0.594      |
| Respiratory rate (/min)                  | 17±4                | 17±4                                  | 17±5                  | <0.001     |
| Body temperature (°C)                    | 36.4±1.0            | 36.4±0.9                              | 36.5±1.1              | 0.137      |
| SpO <sub>2</sub> (%)                     | 96±8                | 96±8                                  | 96±7                  | 0.725      |
| Glasgow coma scale                       | 7±3                 | 7±3                                   | 7±3                   | 0.497      |
| Ventilator mode (%)                      |                     |                                       |                       | <0.001     |
| Pressure control mode                    | 7269 (42.9)         | 41.5                                  | 49.6                  |            |
| Volume control mode                      | 6488 (38.3)         | 41.1                                  | 24.8                  |            |
| Pressure support                         | 1135 (6.7)          | 6.4                                   | 8.2                   |            |
| SIMV                                     | 1775 (10.4)         | 9.4                                   | 15.5                  |            |
| CPAP                                     | 273 (1.6)           | 1.6                                   | 1.9                   |            |
| FiO <sub>2</sub>                         | 65±23               | 65±23                                 | 65±25                 | 0.685      |
| PaO <sub>2</sub> /FiO <sub>2</sub> ratio | 246±177             | 248±178                               | 234±170               | <0.001     |
| Arterial blood gases                     |                     |                                       |                       |            |
| pH                                       | 7.31±0.15           | 7.31±0.15                             | 7.31±0.14             | 0.057      |
| PaCO <sub>2</sub> (mmHg)                 | 41±17               | 41±17                                 | 39±18                 | <0.001     |
| PaO <sub>2</sub> (mmHg)                  | 140±93              | 142±94                                | 129±86                | <0.001     |
| HCO <sub>3</sub> <sup>-</sup> (mmol/L)   | 20±6                | 20±6                                  | 20±6                  | <0.001     |
| BE                                       | -5.6±7.2            | -5.5±7.2                              | -6.4±7.1              | <0.001     |
| SaO <sub>2</sub> (%)                     | 94±12               | 94±11                                 | 93±12                 | 0.029      |
| Laboratory results                       |                     |                                       |                       |            |
| White blood cells (×10 <sup>9</sup> /L)  | 13.1±8.0            | 13.1±8.0                              | 13.1±8.2              | 0.958      |
| Hematocrit                               | 34.6±7.6            | 34.6±7.6                              | 34.6±7.5              | 0.960      |
| Hemoglobin (g/dL)                        | 11.4±2.6            | 11.5±2.6                              | 11.4±2.5              | 0.489      |
| Platelets (×10 <sup>9</sup> /L)          | 202±115             | 202±115                               | 203±117               | 0.683      |
| Aspartate aminotransferase (IU/L)        | 191±864             | 188±847                               | 207±940               | 0.302      |
| Alanine aminotransferase (IU/L)          | 94±361              | 93±345                                | 98±427                | 0.453      |
| Blood urea nitrogen (mg/dL)              | 27.4±22.0           | 27.3±22.1                             | 28.1±21.6             | 0.088      |
| Serum creatinine (mg/dL)                 | 1.6±1.7             | 1.6±1.8                               | 1.6±1.7               | 0.211      |
| eGFR (mL/min/1.73m <sup>2</sup> )        | 74±58               | 75±60                                 | 68±48                 | <0.001     |
| Serum sodium (mmol/L)                    | 139±7               | 138±6                                 | 141±7                 | <0.001     |
| Serum potassium (mmol/L)                 | 4.2±0.9             | 4.2±0.9                               | 4.3±0.9               | <0.001     |
| Serum chloride (mmol/L)                  | 104±7               | 104±7                                 | 104±8                 | 0.050      |

Values are presented as the mean±SD or as %. SpO<sub>2</sub>, pulse oximeter saturation; SIMV, synchronized intermittent mandatory ventilation; CPAP, continuous positive airway pressure; FiO<sub>2</sub>, fraction of inspired oxygen; PaCO<sub>2</sub>, partial pressure of carbon dioxide; PaO<sub>2</sub>, partial pressure of oxygen; HCO<sub>3</sub><sup>-</sup>, bicarbonate; BE, base excess; SaO<sub>2</sub>, arterial oxygen saturation; eGFR, estimated glomerular filtration rate.

**Table S4.** Variables included in the machine learning algorithms.

| Variables                                                 | Details                                                                        |
|-----------------------------------------------------------|--------------------------------------------------------------------------------|
| Age                                                       |                                                                                |
| Sex                                                       |                                                                                |
| Height                                                    |                                                                                |
| Weight                                                    |                                                                                |
| Body mass index                                           |                                                                                |
| Interval between hospitalization and ICU admission (days) |                                                                                |
| Interval between hospitalization and MV initiation (days) |                                                                                |
| Status post tracheostomy                                  |                                                                                |
| Transfer from skilled nursing facility                    |                                                                                |
| APACHE II score                                           |                                                                                |
| Charlson Comorbidity Index (CCI)                          |                                                                                |
| Age group                                                 | 0, <50 years; 1, 50–59 years; 2, 60–69 years; 3, 70–79 years; and 4, ≥80 years |
| Systolic blood pressure                                   |                                                                                |
| Diastolic blood pressure                                  |                                                                                |
| Mean blood pressure                                       |                                                                                |
| Heart rate                                                |                                                                                |
| Body temperature                                          |                                                                                |
| SpO <sub>2</sub>                                          |                                                                                |
| Ventilator mode                                           |                                                                                |
| Respiratory rate                                          |                                                                                |
| FiO <sub>2</sub>                                          |                                                                                |
| Glasgow coma scale                                        |                                                                                |
| pH                                                        |                                                                                |
| PaCO <sub>2</sub>                                         |                                                                                |
| PaO <sub>2</sub>                                          |                                                                                |
| HCO <sub>3</sub>                                          |                                                                                |
| SaO <sub>2</sub>                                          | First value checked on the day of MV initiation in the ICU                     |
| Base excess                                               |                                                                                |
| PaO <sub>2</sub> /FiO <sub>2</sub>                        |                                                                                |
| White blood cell                                          |                                                                                |
| Hemoglobin                                                |                                                                                |
| Hematocrit                                                |                                                                                |
| Platelet                                                  |                                                                                |
| Aspartate aminotransferase                                |                                                                                |
| Alanine aminotransferase                                  |                                                                                |
| Blood urea nitrogen                                       |                                                                                |
| Serum creatinine                                          |                                                                                |
| eGFR                                                      |                                                                                |
| Serum sodium                                              |                                                                                |
| Serum potassium                                           |                                                                                |
| Serum chloride                                            |                                                                                |
| Packed red blood cell                                     | Units of blood transfusion                                                     |
| Fresh frozen plasma                                       |                                                                                |
| Platelet concentrate                                      |                                                                                |
| Continuous renal replacement therapy                      |                                                                                |



|                                                                                                     |                                                                                           |
|-----------------------------------------------------------------------------------------------------|-------------------------------------------------------------------------------------------|
| Norepinephrine                                                                                      |                                                                                           |
| Epinephrine                                                                                         |                                                                                           |
| Dobutamine                                                                                          |                                                                                           |
| Dopamine                                                                                            |                                                                                           |
| Vasopressin                                                                                         |                                                                                           |
| Hydrocortisone                                                                                      |                                                                                           |
| Dexamethasone                                                                                       |                                                                                           |
| Methylprednisolone                                                                                  |                                                                                           |
| Propofol                                                                                            |                                                                                           |
| Midazolam                                                                                           |                                                                                           |
| Fentanyl                                                                                            |                                                                                           |
| Remifentanyl                                                                                        |                                                                                           |
| Atracurium                                                                                          |                                                                                           |
| Cisatracurium                                                                                       |                                                                                           |
| Rocuronium                                                                                          |                                                                                           |
| Vecuronium                                                                                          |                                                                                           |
| Diagnostic criteria                                                                                 | KCD-7 codes                                                                               |
| Certain infectious and parasitic diseases                                                           | A00–B99                                                                                   |
| Neoplasms                                                                                           | C00–D48                                                                                   |
| Diseases of the blood and blood-forming organs and certain disorders involving the immune mechanism | D50–D89                                                                                   |
| Endocrine, nutritional, and metabolic diseases                                                      | E00–E90                                                                                   |
| Mental and behavioral disorders                                                                     | F00–F99                                                                                   |
| Diseases of the nervous system                                                                      | G00–G99                                                                                   |
| Diseases of the eye and adnexa                                                                      | H00–H59                                                                                   |
| Diseases of the ear and mastoid process                                                             | H60–H95                                                                                   |
| Diseases of the circulatory system                                                                  | I00–I99                                                                                   |
| Diseases of the respiratory system                                                                  | J00–J99                                                                                   |
| Diseases of the digestive system                                                                    | K00–K93                                                                                   |
| Diseases of the skin and subcutaneous tissue                                                        | L00–L99                                                                                   |
| Diseases of the musculoskeletal system and connective tissue                                        | M00–M99                                                                                   |
| Diseases of the genitourinary system                                                                | N00–N99                                                                                   |
| Pregnancy, childbirth, and the puerperium                                                           | O00–O99                                                                                   |
| Certain conditions originating in the perinatal period                                              | P00–P96                                                                                   |
| Congenital malformations, deformations, and chromosomal abnormalities                               | Q00–Q99                                                                                   |
| Symptoms, signs, and abnormal clinical and laboratory findings, not elsewhere classified            | R00–R99                                                                                   |
| Injury, poisoning, and certain other consequences of external causes                                | S00–T98                                                                                   |
| Comorbidities                                                                                       | ICD-10 codes of CCI                                                                       |
| Myocardial infarction                                                                               | I21.x, I22.x, I25.2                                                                       |
| Congestive heart failure                                                                            | I09.9, I11.0, I13.0, I13.2, I25.5, I42.0, I42.5–I42.9, I43.x, I50.x, P29.0                |
| Peripheral vascular disease                                                                         | I70.x, I71.x, I73.1, I73.8, I73.9, I77.1, I79.0, I79.2, K55.1, K55.8, K55.9, Z95.8, Z95.9 |
| Cerebrovascular disease                                                                             | G45.x, G46.x, H34.0, I60.x–I69.x                                                          |
| Dementia                                                                                            | F00.x–F03.x, F05.1, G30.x, G31.1                                                          |

|                                                                                    |                                                                                                                                                                               |
|------------------------------------------------------------------------------------|-------------------------------------------------------------------------------------------------------------------------------------------------------------------------------|
| Chronic pulmonary disease                                                          | I27.8, I27.9, J40.x–J47.x, J60.x–J67.x, J68.4, J70.1, J70.3                                                                                                                   |
| Rheumatic disease                                                                  | M05.x, M06.x, M31.5, M32.x–M34.x, M35.1, M35.3, M36.0                                                                                                                         |
| Peptic ulcer disease                                                               | K25.x–K28.x                                                                                                                                                                   |
| Mild liver disease                                                                 | B18.x, K70.0–K70.3, K70.9, K71.3–K71.5, K71.7, K73.x, K74.x, K76.0, K76.2–K76.4, K76.8, K76.9, Z94.4                                                                          |
| Moderate or severe liver disease                                                   | I85.0, I85.9, I86.4, I98.2, K70.4, K71.1, K72.1, K72.9, K76.5, K76.6, K76.7                                                                                                   |
| Diabetes without chronic complication                                              | E10.0, E10.1, E10.6, E10.8, E10.9, E11.0, E11.1, E11.6, E11.8, E11.9, E12.0, E12.1, E12.6, E12.8, E12.9, E13.0, E13.1, E13.6, E13.8, E13.9, E14.0, E14.1, E14.6, E14.8, E14.9 |
| Diabetes with chronic complication                                                 | E10.2–E10.5, E10.7, E11.2–E11.5, E11.7, E12.2–E12.5, E12.7, E13.2–E13.5, E13.7, E14.2–E14.5, E14.7                                                                            |
| Hemiplegia or paraplegia                                                           | G04.1, G11.4, G80.1, G80.2, G81.x, G82.x, G83.0–G83.4, G83.9                                                                                                                  |
| Renal disease                                                                      | I12.0, I13.1, N03.2–N03.7, N05.2–N05.7, N18.x, N19.x, N25.0, Z49.0–Z49.2, Z94.0, Z99.2                                                                                        |
| Any malignancy, including lymphoma and leukemia, except malignant neoplasm of skin | C00.x–C26.x, C30.x–C34.x, C37.x–C41.x, C43.x, C45.x–C58.x, C60.x–C76.x, C81.x–C85.x, C88.x, C90.x–C97.x                                                                       |
| Metastatic solid tumor                                                             | C77.x–C80.x                                                                                                                                                                   |
| AIDS/HIV                                                                           | B20.x–B22.x, B24.x                                                                                                                                                            |

ICU, intensive care unit; MV, mechanical ventilation; APACHE, Acute Physiology and Chronic Health Evaluation; CCI, Charlson Comorbidity Index; SpO<sub>2</sub>, pulse oximeter saturation; FiO<sub>2</sub>, fraction of inspired oxygen; PaCO<sub>2</sub>, partial pressure of carbon dioxide; PaO<sub>2</sub>, partial pressure of oxygen; HCO<sub>3</sub><sup>-</sup>, bicarbonate; SaO<sub>2</sub>, arterial oxygen saturation; and eGFR, estimated glomerular filtration rate; KCD-7: Korean Standard Classification of Diseases-7; ICD-10, International Classification of Diseases-10; AIDS, acquired immune deficiency syndrome; HIV, human immunodeficiency virus.
